# Supplementary material for: Optimization and hydrolysis of cellulose under subcritical water treatment for the production of total reducing sugars
Source: Royal Society of Chemistry journal article supplement (doi:10.1039/c5ra20319h), 2015-01-01
Supplement: c5ra20319h1.pdf [file c5ra20319h1.pdf]

## Supplementary Information

### Optimization and Hydrolysis of Cellulose under Subcritical Water Treatment for the Production of Total Reducing Sugars

Mood Mohan<sup>a</sup>, Robinson Timunga<sup>a</sup>, Narendra Naik Deshavath<sup>b</sup>, Tamal Banerjee<sup>a,\*</sup>, Vaibhav  
V Goud<sup>a,b,\*</sup>, Venkata V Dasu<sup>b,c</sup>

<sup>a</sup> Department of Chemical Engineering, Indian Institute of Technology Guwahati, Guwahati, Assam-  
781039, India

<sup>b</sup> Centre for the Environment, Indian Institute of Technology Guwahati, Guwahati, Assam- 781039,  
India

<sup>c</sup> Department of Biosciences and Bioengineering, Indian Institute of Technology Guwahati, Guwahati,  
Assam- 781039, India

\* Corresponding authors:

E-mail address: tamalb@iitg.ernet.in (Dr. Tamal Banerjee)

Tel.: +91-361-2582266; fax: +91 361 2582291

E-mail address: vvgoud@iitg.ernet.in (Dr. Vaibhav V Goud)

Tel.: +91-361-2582272; fax: +91-361-2582291

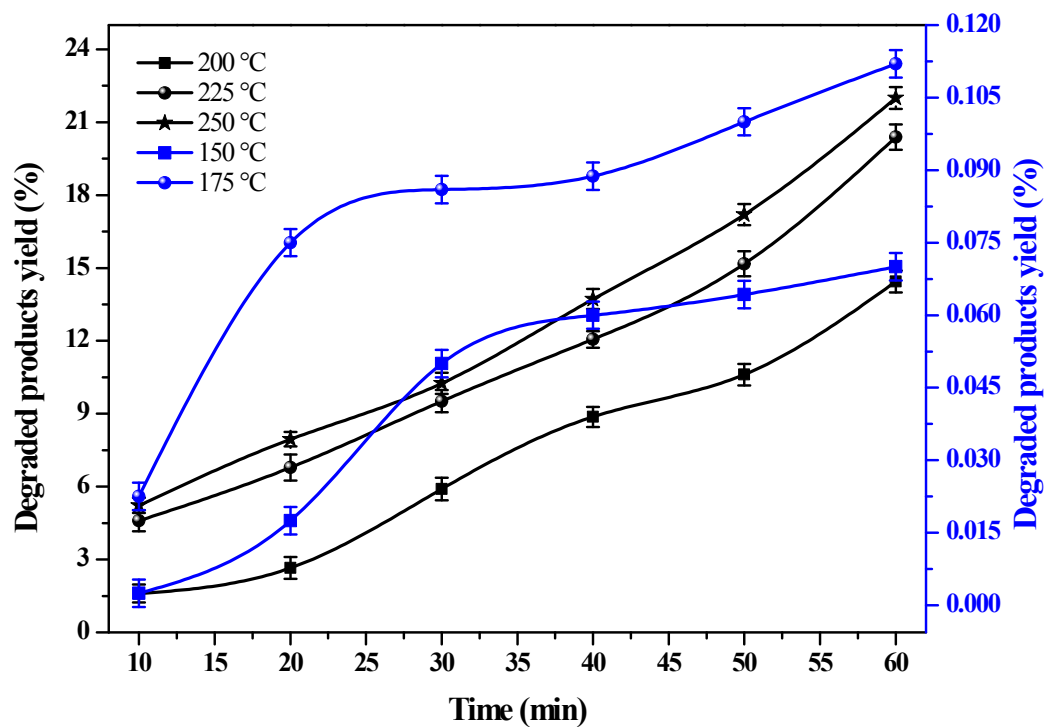

**Fig. S1** Yield of degraded products as obtained in cellulose at different temperature plotted against reaction time.
